# Supplementary material for: Diverse bacteriophages for biocontrol of ESBL- and AmpC-β-lactamase-producing E. coli
Source: PubMed Central journal article supplement (PMC10844046; doi:10.1016/j.isci.2024.108826), 2024-01-17
Supplement: mmc1.pdf [file mmc1.pdf]

iScience, Volume 27

## Supplemental information

### **Diverse bacteriophages for biocontrol of ESBL- and AmpC- $\beta$ -lactamase-producing *E. coli***

**Amira R. Vitt, Anders Nørgaard Sørensen, Martin S. Bojer, Valeria Bortolaia, Martine C. Holst Sørensen, and Lone Brøndsted**

## Supplementary information

**Table S2:** The ability of each phage to infect diverse phylogroup and ST, related to Figure 4.

**Table S3:** List of primers for deletions of common bacteriophage receptor genes in *E. coli* strain ECOR4, related to Figure 5.

**Table S4:** List of primers for control of the deletion of genes expressing common bacteriophage receptor genes in *E. coli* strain ECOR4, related to Figure 5.

**Figure S1:** Protein sequence alignment of gp38 corresponding to the chaperone encoded by T4, related to Figure 5.

**Figure S2:** Protein sequence alignment of the tail fibers corresponding to the adhesins encoded by gp38 homologues of the phages T2 and T6, related to Figure 5.

**Figure S3:** Protein sequence alignment of gp37 of T4 and its homologues, related to Figure 5.

## References

1. Vitt, A.R., Sørensen, M.C.H., Bortolaia, V., and Brøndsted, L. (2023). A Representative Collection of Commensal Extended-Spectrum- and AmpC- $\beta$ -Lactamase-Producing *Escherichia coli* of Animal Origin for Phage Sensitivity Studies. *PHAGE: Therapy, Applications, and Research* 4, 35–45. [10.1089/phage.2023.0002](https://doi.org/10.1089/phage.2023.0002)

**Table S2: The ability of each phage to infect diverse phylogroup and STs, related to Figure 4.**

| Phage | Number of infected strains | Phylo-groups                | STs based on MLST analysis                                                                                                                                                                                                                                                                          |
|-------|----------------------------|-----------------------------|-----------------------------------------------------------------------------------------------------------------------------------------------------------------------------------------------------------------------------------------------------------------------------------------------------|
| AV101 | 9                          | A, B1, C                    | ST-1800, ST-2040, ST-6206, ST-641, ST-88                                                                                                                                                                                                                                                            |
| AV102 | 4                          | B1, C                       | ST-162, ST-1431, ST-23                                                                                                                                                                                                                                                                              |
| AV103 | 4                          | B1, C                       | ST-23, ST-641, ST-6254, ST-453                                                                                                                                                                                                                                                                      |
| AV104 | 2                          | D                           | ST-69, ST-4243                                                                                                                                                                                                                                                                                      |
| AV105 | 2                          | D                           | ST-69, ST-4243                                                                                                                                                                                                                                                                                      |
| AV106 | 1                          | C                           | ST88                                                                                                                                                                                                                                                                                                |
| AV108 | 5                          | A, B1                       | ST-295, ST-10, ST-154, ST-6206                                                                                                                                                                                                                                                                      |
| AV109 | 9                          | B1, C                       | ST-88, ST-7614, ST-4663, ST-295                                                                                                                                                                                                                                                                     |
| AV110 | 48                         | A, B1, B2, C, G             | ST-10, ST-101, ST-117, ST-1431, ST-154, ST-155, ST-156, ST-23, ST-295, ST-345, ST-3564, ST-429, ST-4580, ST-4663, ST-4980, ST-58, ST-665, ST-718, ST-75, ST-88                                                                                                                                      |
| AV111 | 46                         | A, B1, C, D, E, F           | ST-10, ST-1147, ST-1640, ST-23, ST-2607, ST-354, ST-4243, ST-453, ST-4663, ST-4980, ST-57, ST-58, ST-641                                                                                                                                                                                            |
| AV112 | 37                         | A, B1, C, D                 | ST-10, ST-101, ST-1011, ST-1431, ST-154, ST-155, ST-156, ST-1800, ST-2040, ST-295, ST-3564, ST-4580, ST-48, ST-4980, ST-58, ST-718, ST-75, ST-877, ST-88                                                                                                                                            |
| AV113 | 25                         | A, B1, C, E                 | ST-295, ST-10, ST-101, ST-1431, ST-154, ST-155, ST-156, ST-1800, ST-295, ST-3564, ST-48, ST-57, ST-58, ST-718, ST-877, ST-88                                                                                                                                                                        |
| AV114 | 29                         | A, B1, C, G                 | ST-117, ST-155, ST-165, ST-295, ST-3564, ST-453, ST-4663, ST-4980, ST-718, ST-7614, ST-88                                                                                                                                                                                                           |
| AV115 | 33                         | A, B1, C, G                 | ST-101, ST-117, ST-1431, ST-165, ST-295, ST-3564, ST-453, ST-4663, ST-58, ST-88                                                                                                                                                                                                                     |
| AV116 | 17                         | A, B1, C                    | ST-101, ST-1431, ST-154, ST-155, ST-156, ST-1800, ST-2040, ST-295, ST-4580, ST-6206, ST-88                                                                                                                                                                                                          |
| AV117 | 16                         | A, B1, C                    | ST-101, ST-1431, ST-154, ST-155, ST-156, ST-1800, ST-2040, ST-295, ST-4580, ST-6206, ST-88                                                                                                                                                                                                          |
| AV118 | 9                          | A, B1, C                    | ST-155, ST-1850, ST-4580, ST-88                                                                                                                                                                                                                                                                     |
| AV119 | 55                         | A, B1, B2, C, D, E, F       | ST-10, ST-1147, ST-115, ST-131, ST-1640, ST-23, ST-355, ST-367, ST-4243, ST-453, ST-4663, ST-4980, ST-57, ST-6858, ST-69, ST-877, ST-88                                                                                                                                                             |
| AV120 | 50                         | A, B1, B2, C, D, E          | ST-10, ST-131, ST-1640, ST-23, ST-2607, ST-367, ST-4243, ST-453, ST-4663, ST-4980, ST-57, ST-58, ST-602, ST-877, ST-88                                                                                                                                                                              |
| AV121 | 26                         | Clade I, A, B1, B2, C, D    | ST-115, ST-131, ST-2309, ST-355, ST-4243, ST-453, ST-4980, ST-770, ST-88                                                                                                                                                                                                                            |
| AV122 | 16                         | Clade I, B1, C, E           | ST-101, ST-1431, ST-154, ST-155, ST-1640, ST-4580, ST-770, ST-877, ST-88                                                                                                                                                                                                                            |
| AV123 | 51                         | A, B1, B2, C, D, E          | ST-101, ST-1056, ST-1147, ST-1286, ST-131, ST-1463, ST-154, ST-155, ST-162, ST-1800, ST-1850, ST-2040, ST-23, ST-2607, ST-38, ST-4243, ST-429, ST-4580, ST-4663, ST-4980, ST-57, ST-602, ST-6206, ST-718, ST-88                                                                                     |
| AV124 | 2                          | C                           | ST-23, ST-88                                                                                                                                                                                                                                                                                        |
| AV125 | 84                         | A, B1, B2, C, D, E          | ST-10, ST-101, ST-1011, ST-1056, ST-1147, ST-115, ST-1431, ST-1463, ST-154, ST-155, ST-156, ST-162, ST-1640, ST-1800, ST-1850, ST-2040, ST-23, ST-2309, ST-2607, ST-295, ST-345, ST-3564, ST-367, ST-38, ST-4243, ST-429, ST-4580, ST-4663, ST-4980, ST-57, ST-602, ST-6206, ST-6254, ST-718, ST-88 |
| AV126 | 65                         | Clade I, A, B1, B2, C, D, E | ST-770, ST-10, ST-101, ST-1011, ST-115, ST-1463, ST-154, ST-155, ST-1640, ST-1800, ST-1850, ST-2040, ST-23, ST-2607, ST-295, ST-345, ST-351, ST-38, ST-4243, ST-429, ST-4580, ST-4980, ST-57, ST-602, ST-6206, ST-718, ST-877, ST-88                                                                |
| AV127 | 13                         | A, B1, C                    | ST-1463, ST-155, ST-23, ST-4980, ST-4980, ST-57, ST-602, ST-88                                                                                                                                                                                                                                      |
| AV128 | 8                          | A, B1, D, E                 | ST-101, ST-1640, ST-2197, ST-38, ST-57                                                                                                                                                                                                                                                              |
| AV129 | 12                         | A, B1, C, D, E              | ST-1640, ST-23, ST-2952, ST-4243, ST-4980                                                                                                                                                                                                                                                           |

**Table S3: List of primers for deletions of common bacteriophage receptor genes in *E. coli* strain ECOR4, related to Figure 5.**

| Primers for deletion fragment amplification |                                                                                |
|---------------------------------------------|--------------------------------------------------------------------------------|
| <b><i>ompW-Up</i></b>                       | ATGAAAAAGTTAACAGTGGCGGCTTTGGCAGTAACAACCTCTTCT<br>CTCTGGAATTAACCCCTCACTAAAGGGCG |
| <b><i>ompW-Dw</i></b>                       | TTAAAAACGATATCCTGCTGAGAGCATAAACACCCACGGATCGA<br>GGCGTATAATACGACTCACTATAGGGCTC  |
| <b><i>tsx-Up</i></b>                        | ATGAAAAAACATTACTGGCAGCCGGTGCGGTACTGGCGCTCT<br>CTTCGTC AATTAACCCCTCACTAAAGGGCG  |
| <b><i>tsx-Dw</i></b>                        | TCAGAAGTTGTAACCTACTACCAGGTAACCACCCAGCCGGTAG<br>AGCGAA TAATACGACTCACTATAGGGCTC  |
| <b><i>waaC-Up</i></b>                       | ATGCGGGTTTTGATCGTTAAACATCGTCGATGGGCGATGTTCT<br>CCATACAATTAACCCCTCACTAAAGGGCG   |
| <b><i>waaC-Dw</i></b>                       | TTAATCAATGTGATTTTTTATAAACAGCCGCTGCTTCTAAATTA<br>TTTA TAATACGACTCACTATAGGGCTC   |
| <b><i>tonB-Up</i></b>                       | ATGACCCTTGATTTACCTCGCCGCTTCCCCTGGCCGACGTTACT<br>TTCGGTAATTAACCCCTCACTAAAGGGCG  |
| <b><i>tonB-Dw</i></b>                       | TACTGAATTTCCGGTGGTGCCGTTAATTTTAAACAGGATATTCAC<br>CACAA TAATACGACTCACTATAGGGCTC |
| <b><i>waaR-Up</i></b>                       | ATGAATGAATTTATAAAAAGAACGGTTTTTCGTATTTAGCAGATAAT<br>AAAAAATTAACCCCTCACTAAAGGGCG |
| <b><i>waaR-Dw</i></b>                       | TTATTTCTTAAGCTTGACTTAATTAATGAAGTTATGCCTTTTATA<br>TACT TAATACGACTCACTATAGGGCTC  |
| <b><i>ompF-Up</i></b>                       | ATGATGAAGCGCAATATTCTGGCAGTGATCGTCCCTGCTCTGTT<br>AGTAGCAATTAACCCCTCACTAAAGGGCG  |
| <b><i>ompF-Dw</i></b>                       | TTAGAACTGGTAAACGATACCCACAGCAACGGTGTCTGCTGAAC<br>CTACGC TAATACGACTCACTATAGGGCTC |
| <b><i>fadL-Up</i></b>                       | ATGAGCCAGAAAACCCTGTTTACAAAGTCTGCTCTCGCAGTCGC<br>AGTGGCAATTAACCCCTCACTAAAGGGCG  |
| <b><i>fadL-Dw</i></b>                       | TCAGAACGCGTAGTTAAAGTTAGTACCGAACAGCCAGGCTTTAC<br>CTTCAG TAATACGACTCACTATAGGGCTC |
| <b><i>ompA-Up</i></b>                       | ATGAAAAAGACAGCTATCGCGATTGCAGTGGCACTGGCTGGTTT<br>CGCTACAATTAACCCCTCACTAAAGGGCG  |
| <b><i>ompA-Dw</i></b>                       | TTAAGCCTGCGGCTGAGTTACAACGTCTTTGATACCTTTAACTTC<br>GATCT TAATACGACTCACTATAGGGCTC |
| <b><i>ompC-Up</i></b>                       | ATGAAAGTTAAAGTACTGTCCCTCCTGGTCCCAGCTCTGCTGGT<br>AGCAGGAATTAACCCCTCACTAAAGGGCG  |
| <b><i>ompC-Dw</i></b>                       | TTAGAACTGGTAAACCAGACCCAGAGCTACGATGTTATCAGTGT<br>TGATGC TAATACGACTCACTATAGGGCTC |
| <b><i>fhuA-Up</i></b>                       | ATGGCGGTTCCAAAACCTGCTCAGCCAAAACACTCACTGCGTAA<br>AATCGCAATTAACCCCTCACTAAAGGGCG  |
| <b><i>fhuA-Dw</i></b>                       | TTAGAAACGGAAGGTTGCGGTTGCAACGACCTGACGTTCTGCG<br>CCCCAGA TAATACGACTCACTATAGGGCTC |
| <b><i>fepA-Up</i></b>                       | ATGAACAAGAAGATTCATTCCCTGGCCTTGTGGTCAATCTGGG<br>GATTTAAATTAACCCCTCACTAAAGGGCG   |
| <b><i>fepA-Dw</i></b>                       | TCAGAAGTGGGTGTTTACGCTCATATACCACGTACGTCCCGGCT<br>CGTTAT TAATACGACTCACTATAGGGCTC |
| <b><i>btuB-Up</i></b>                       | CCGCTTGGGCACAGGATACCAGCCGGATACTCTCGTCGTTAC<br>TGCTAACCAATTAACCCCTCACTAAAGGGCG  |
| <b><i>btuB-Dw</i></b>                       | ATCGATCAAGTCACTGACATCGTTACGATATCCGGAAATACGCC<br>AGTTCA TAATACGACTCACTATAGGGCTC |
| <b><i>tolC-Up</i></b>                       | ATGAAGAAATTGCTCCCCATTCTTATCGGCCTGAGCCTTTCTGG<br>GTTCAGAATTAACCCCTCACTAAAGGGCG  |
| <b><i>tolC-Dw</i></b>                       | TCAGTTACGGAAAGGTTATGACCGTTACTGGTGGTAGTGCGT<br>GCGGATG TAATACGACTCACTATAGGGCTC  |

|                       |                                                                               |
|-----------------------|-------------------------------------------------------------------------------|
| <b><i>lamB-Up</i></b> | ATGATGATTACTCTGCGCAAACCTCCTCTGGCGGTTGCCGTCGC<br>AGCGGGAATTAACCCTCACTAAAGGGCG  |
| <b><i>lamB-Dw</i></b> | TTACCACCAGATTTCCATCTGGGCACCGAAGGTCCACTCGTCGC<br>TGTCGCTAATACGACTCACTATAGGGCTC |

**Table S4: List of primers for control of the deletion of genes expressing common bacteriophage receptor genes in *E. coli* strain ECOR4, related to Figure 5.**

| <b>Primers for deletion control</b> |                                    |
|-------------------------------------|------------------------------------|
| <b><i>ompW-F</i></b>                | ATGAAAAAGTTAACAGTGGCG              |
| <b><i>ompW-R</i></b>                | TTAAAAACGATATCCTGCTGAGAG           |
| <b><i>tsx_F</i></b>                 | ATGAAAAAACATTACTGGCAGCC            |
| <b><i>tsx_R</i></b>                 | TCAGAAGTTGTAACCTACTACCAGG          |
| <b><i>waaC_F</i></b>                | ATGCGGGTTTTGATCGTTAAACATC          |
| <b><i>waaC_R</i></b>                | TTAATCAATGTGATTTTTTATAAACAGCCG     |
| <b><i>tonB-F</i></b>                | ATGACCCTTGATTTACCTCGC              |
| <b><i>tonB-R</i></b>                | TACTGAATTTTCGGTGGTGC               |
| <b><i>waaR_F</i></b>                | ATGAATGAATTTATAAAAGAACGGTTTTCG     |
| <b><i>waaR_R</i></b>                | TTATTTCTTAAGCTTGACTTAATTAATGAAGTTA |
| <b><i>ompF_F</i></b>                | ATGATGAAGCGCAATATTCTGGC            |
| <b><i>ompF_R</i></b>                | TTAGAACTGGTAAACGATACCCACAG         |
| <b><i>fadL_F</i></b>                | ATGAGCCAGAAAACCCTGTTTACAAAG        |
| <b><i>fadL_R</i></b>                | TCAGAACGCGTAGTTAAAGTTAGTAC         |
| <b><i>ompA_F</i></b>                | ATGAAAAAGACAGCTATCGCGATTG          |
| <b><i>ompA_R</i></b>                | TTAAGCCTGCGGCTGAGTTACAAC           |
| <b><i>ompC_F</i></b>                | ATGAAAGTTAAAGTACTGTCCCTCC          |
| <b><i>ompC_R</i></b>                | TTAGAACTGGTAAACCAGACCCAG           |
| <b><i>fhuA_F</i></b>                | ATGGCGCGTTCCAAAACCTGC              |
| <b><i>fhuA_R</i></b>                | TTAGAAACGGAAGGTTGCGGTTG            |
| <b><i>fepA-F</i></b>                | ATGAACAAGAAGATTCATTCCCTG           |
| <b><i>fepA-R</i></b>                | TCAGAAGTGGGTGTTTACGC               |
| <b><i>btuB_F</i></b>                | ATGATTA AAAAAGCTTCGCTGCTGAC        |
| <b><i>btuB_R</i></b>                | TCAGAAGGTGTAGCTGCCAGACAAG          |
| <b><i>tolC_F</i></b>                | ATGAAGAAATTGCTCCCCATTCTTATC        |
| <b><i>tolC_R</i></b>                | TCAGTTACGGAAGGGTTATGACC            |

|                      |                            |
|----------------------|----------------------------|
| <b><i>lamB_F</i></b> | ATGATGATTACTCTGCGCAAACCTTC |
| <b><i>lamB_R</i></b> | TTACCACCAGATTTCCATCTGGG    |





**Figure S3. Protein sequence alignment of gp37 of T4 and full sequences of gp37 of phage T4 and AV110, AV112, AV113, AV116, AV117, AV118, AV122, related to Figure 5. Differing residues are highlighted in red.**

|              |            |            |            |            |             |            |            |            |             |            |           |     |
|--------------|------------|------------|------------|------------|-------------|------------|------------|------------|-------------|------------|-----------|-----|
| AV110_Gp37   | MATLKIQIFK | RSKVAQVNP  | AAQLAEGELA | INLKDRTLFT | KDDLGN IISL | FFAKGGDING | NVTOGDYDQ  | NG-----TY  | NLNGNQFYVA  | KXYIEFLPKT | 94        |     |
| AV118_Gp37   | MATLKIQIFK | RSKVAQVNP  | AAQLAEGELA | INLKDRTLFT | KDDLGN IISL | FFAKGGDING | NVTOGDYDQ  | NG-----TY  | NLNGNQFYVA  | KXYIEFLPKT | 94        |     |
| AV112_Gp37   | MATLKIQIFK | RSKVAQVNP  | AAQLAEGELA | INLKDRTLFT | KDDLGN IISL | FFAKGGDING | NVTOGDYDQ  | NG-----TY  | NLNGNQFYVA  | KXYIEFLPKT | 94        |     |
| AV113_Gp37   | MATLKIQIFK | RSKVAQVNP  | AAQLAEGELA | INLKDRTLFT | KDDLGN IISL | FFAKGGDING | NVTOGDYDQ  | NG-----TY  | NLNGNQFYVA  | KXYIEFLPKT | 94        |     |
| AV117_Gp37   | MATLKIQIFK | RSKVAQVNP  | AAQLAEGELA | INLKDRTLFT | KDDLGN IISL | FFAKGGDING | NVTOGDYDQ  | NG-----TY  | NLNGNQFYVA  | KXYIEFLPKT | 94        |     |
| T4_Gp37      | MATLKIQIFK | RSKVAQVNP  | AAQLAEGELA | INLKDRTLFT | KDDLGN IISL | FFAKGGDING | NVTOGDYDQ  | NG-----TY  | NLNGNQFYVA  | KXYIEFLPKT | 94        |     |
| AV116_Gp37   | MATLKIQIFK | RSKVAQVNP  | AAQLAEGELA | INLKDRTLFT | KDDLGN IISL | FFAKGGDING | NVTOGDYDQ  | NG-----TY  | NLNGNQFYVA  | KXYIEFLPKT | 94        |     |
| AV122_Gp37   | MATLKIQIFK | RSKVAQVNP  | AAQLAEGELA | INLKDRTLFT | KDDLGN IISL | FFAKGGDING | NVTOGDYDQ  | NG-----TY  | NLNGNQFYVA  | KXYIEFLPKT | 94        |     |
| Conservation |            |            |            |            |             |            |            |            |             |            |           |     |
| AV110_Gp37   | TCNGAWAN-- | -QHNKAPIF  | TDLSSSTTSS | EYHPLIKORY | KDGTFFSAGTL | VNEGSKFHY  | IDETG--TSK | YWTFNRRNGF | QVDSGSLEVS  | NCVLEVTQSN | 189       |     |
| AV118_Gp37   | TCNGAWAN-- | -QHNKAPIF  | TDLSSSTTSS | EYHPLIKORY | KDGTFFSAGTL | VNEGSKFHY  | IDETG--TSK | YWTFNRRNGF | QVDSGSLEVS  | NCVLEVTQSN | 189       |     |
| AV112_Gp37   | TCNGAWAN-- | -QHNKAPIF  | TDLSSSTTSS | EYHPLIKORY | KDGTFFSAGTL | VNEGSKFHY  | IDETG--TSK | YWTFNRRNGF | QVDSGSLEVS  | NCVLEVTQSN | 189       |     |
| AV113_Gp37   | TCNGAWAN-- | -QHNKAPIF  | TDLSSSTTSS | EYHPLIKORY | KDGTFFSAGTL | VNEGSKFHY  | IDETG--TSK | YWTFNRRNGF | QVDSGSLEVS  | NCVLEVTQSN | 189       |     |
| AV117_Gp37   | TCNGAWAN-- | -QHNKAPIF  | TDLSSSTTSS | EYHPLIKORY | KDGTFFSAGTL | VNEGSKFHY  | IDETG--TSK | YWTFNRRNGF | QVDSGSLEVS  | NCVLEVTQSN | 189       |     |
| T4_Gp37      | TCNGAWAN-- | -QHNKAPIF  | TDLSSSTTSS | EYHPLIKORY | KDGTFFSAGTL | VNEGSKFHY  | IDETG--TSK | YWTFNRRNGF | QVDSGSLEVS  | NCVLEVTQSN | 189       |     |
| AV116_Gp37   | TCNGAWAN-- | -QHNKAPIF  | TDLSSSTTSS | EYHPLIKORY | KDGTFFSAGTL | VNEGSKFHY  | IDETG--TSK | YWTFNRRNGF | QVDSGSLEVS  | NCVLEVTQSN | 189       |     |
| AV122_Gp37   | TCNGAWAN-- | -QHNKAPIF  | TDLSSSTTSS | EYHPLIKORY | KDGTFFSAGTL | VNEGSKFHY  | IDETG--TSK | YWTFNRRNGF | QVDSGSLEVS  | NCVLEVTQSN | 189       |     |
| Conservation |            |            |            |            |             |            |            |            |             |            |           |     |
| AV110_Gp37   | ETRAGSLVGP | KVTKNINIS  | TKSWDTNIDI | AYDVLSPFTV | RYPTFT--TD  | LDITNGINYL | KFRGHVSSAI | FHEVDARSG  | KPQNIISVWTC | RNAEVEVQSY | 287       |     |
| AV118_Gp37   | ETRAGSLVGP | KVTKNINIS  | TKSWDTNIDI | AYDVLSPFTV | RYPTFT--TD  | LDITNGINYL | KFRGHVSSAI | FHEVDARSG  | KPQNIISVWTC | RNAEVEVQSY | 287       |     |
| AV112_Gp37   | ETRAGSLVGP | KVTKNINIS  | TKSWDTNIDI | AYDVLSPFTV | RYPTFT--TD  | LDITNGINYL | KFRGHVSSAI | FHEVDARSG  | KPQNIISVWTC | RNAEVEVQSY | 287       |     |
| AV113_Gp37   | ETRAGSLVGP | KVTKNINIS  | TKSWDTNIDI | AYDVLSPFTV | RYPTFT--TD  | LDITNGINYL | KFRGHVSSAI | FHEVDARSG  | KPQNIISVWTC | RNAEVEVQSY | 287       |     |
| AV117_Gp37   | ETRAGSLVGP | KVTKNINIS  | TKSWDTNIDI | AYDVLSPFTV | RYPTFT--TD  | LDITNGINYL | KFRGHVSSAI | FHEVDARSG  | KPQNIISVWTC | RNAEVEVQSY | 287       |     |
| T4_Gp37      | ETRAGSLVGP | KVTKNINIS  | TKSWDTNIDI | AYDVLSPFTV | RYPTFT--TD  | LDITNGINYL | KFRGHVSSAI | FHEVDARSG  | KPQNIISVWTC | RNAEVEVQSY | 287       |     |
| AV116_Gp37   | ETRAGSLVGP | KVTKNINIS  | TKSWDTNIDI | AYDVLSPFTV | RYPTFT--TD  | LDITNGINYL | KFRGHVSSAI | FHEVDARSG  | KPQNIISVWTC | RNAEVEVQSY | 287       |     |
| AV122_Gp37   | ETRAGSLVGP | KVTKNINIS  | TKSWDTNIDI | AYDVLSPFTV | RYPTFT--TD  | LDITNGINYL | KFRGHVSSAI | FHEVDARSG  | KPQNIISVWTC | RNAEVEVQSY | 287       |     |
| Conservation |            |            |            |            |             |            |            |            |             |            |           |     |
| AV110_Gp37   | ITDGRMSVAN | SIGIGLADVQ | DGG-RYFLVS | --FF-GKGI  | AIDNDTCK    | KWV        | RDGVIDLMA  | GISSATILNN | GINSTKLMV   | GYSRDSGSTW | DFPNNQAMF | 383 |
| AV118_Gp37   | ITDGRMSVAN | SIGIGLADVQ | DGG-RYFLVS | --FF-GKGI  | AIDNDTCK    | KWV        | RDGVIDLMA  | GISSATILNN | GINSTKLMV   | GYSRDSGSTW | DFPNNQAMF | 383 |
| AV112_Gp37   | ITDGRMSVAN | SIGIGLADVQ | DGG-RYFLVS | --FF-GKGI  | AIDNDTCK    | KWV        | RDGVIDLMA  | GISSATILNN | GINSTKLMV   | GYSRDSGSTW | DFPNNQAMF | 383 |
| AV113_Gp37   | ITDGRMSVAN | SIGIGLADVQ | DGG-RYFLVS | --FF-GKGI  | AIDNDTCK    | KWV        | RDGVIDLMA  | GISSATILNN | GINSTKLMV   | GYSRDSGSTW | DFPNNQAMF | 383 |
| AV117_Gp37   | ITDGRMSVAN | SIGIGLADVQ | DGG-RYFLVS | --FF-GKGI  | AIDNDTCK    | KWV        | RDGVIDLMA  | GISSATILNN | GINSTKLMV   | GYSRDSGSTW | DFPNNQAMF | 383 |
| T4_Gp37      | ITDGRMSVAN | SIGIGLADVQ | DGG-RYFLVS | --FF-GKGI  | AIDNDTCK    | KWV        | RDGVIDLMA  | GISSATILNN | GINSTKLMV   | GYSRDSGSTW | DFPNNQAMF | 383 |
| AV116_Gp37   | ITDGRMSVAN | SIGIGLADVQ | DGG-RYFLVS | --FF-GKGI  | AIDNDTCK    | KWV        | RDGVIDLMA  | GISSATILNN | GINSTKLMV   | GYSRDSGSTW | DFPNNQAMF | 383 |
| AV122_Gp37   | ITDGRMSVAN | SIGIGLADVQ | DGG-RYFLVS | --FF-GKGI  | AIDNDTCK    | KWV        | RDGVIDLMA  | GISSATILNN | GINSTKLMV   | GYSRDSGSTW | DFPNNQAMF | 383 |
| Conservation |            |            |            |            |             |            |            |            |             |            |           |     |
| AV110_Gp37   | TARTDWDGNN | NGCQDTHIGY | SNAKMYHYF  | RTGRMSVSM  | DGGLVEVPGI  | LDIKTGSNLS | NLRADGTIAS | VQTLKLNGL  | YFNGDGTNAS  | LVFKAASGID | 483       |     |
| AV118_Gp37   | TARTDWDGNN | NGCQDTHIGY | SNAKMYHYF  | RTGRMSVSM  | DGGLVEVPGI  | LDIKTGSNLS | NLRADGTIAS | VQTLKLNGL  | YFNGDGTNAS  | LVFKAASGID | 483       |     |
| AV112_Gp37   | TARTDWDGNN | NGCQDTHIGY | SNAKMYHYF  | RTGRMSVSM  | DGGLVEVPGI  | LDIKTGSNLS | NLRADGTIAS | VQTLKLNGL  | YFNGDGTNAS  | LVFKAASGID | 483       |     |
| AV113_Gp37   | TARTDWDGNN | NGCQDTHIGY | SNAKMYHYF  | RTGRMSVSM  | DGGLVEVPGI  | LDIKTGSNLS | NLRADGTIAS | VQTLKLNGL  | YFNGDGTNAS  | LVFKAASGID | 483       |     |
| AV117_Gp37   | TARTDWDGNN | NGCQDTHIGY | SNAKMYHYF  | RTGRMSVSM  | DGGLVEVPGI  | LDIKTGSNLS | NLRADGTIAS | VQTLKLNGL  | YFNGDGTNAS  | LVFKAASGID | 483       |     |
| T4_Gp37      | TARTDWDGNN | NGCQDTHIGY | SNAKMYHYF  | RTGRMSVSM  | DGGLVEVPGI  | LDIKTGSNLS | NLRADGTIAS | VQTLKLNGL  | YFNGDGTNAS  | LVFKAASGID | 483       |     |
| AV116_Gp37   | TARTDWDGNN | NGCQDTHIGY | SNAKMYHYF  | RTGRMSVSM  | DGGLVEVPGI  | LDIKTGSNLS | NLRADGTIAS | VQTLKLNGL  | YFNGDGTNAS  | LVFKAASGID | 483       |     |
| AV122_Gp37   | TARTDWDGNN | NGCQDTHIGY | SNAKMYHYF  | RTGRMSVSM  | DGGLVEVPGI  | LDIKTGSNLS | NLRADGTIAS | VQTLKLNGL  | YFNGDGTNAS  | LVFKAASGID | 483       |     |
| Conservation |            |            |            |            |             |            |            |            |             |            |           |     |
| AV110_Gp37   | GTKQIMWEGG | TRAGQNKSYV | TVKAWGNSFN | ATGDKARETV | FEVSDQCQYY  | FYSQRVAPTG | SETTGPVVQ  | FNGQVNARGS | ITDGS LRVN  | GLSTLVGNVT | 583       |     |
| AV118_Gp37   | GTKQIMWEGG | TRAGQNKSYV | TVKAWGNSFN | ATGDKARETV | FEVSDQCQYY  | FYSQRVAPTG | SETTGPVVQ  | FNGQVNARGS | ITDGS LRVN  | GLSTLVGNVT | 583       |     |
| AV112_Gp37   | GTKQIMWEGG | TRAGQNKSYV | TVKAWGNSFN | ATGDKARETV | FEVSDQCQYY  | FYSQRVAPTG | SETTGPVVQ  | FNGQVNARGS | ITDGS LRVN  | GLSTLVGNVT | 583       |     |
| AV113_Gp37   | GTKQIMWEGG | TRAGQNKSYV | TVKAWGNSFN | ATGDKARETV | FEVSDQCQYY  | FYSQRVAPTG | SETTGPVVQ  | FNGQVNARGS | ITDGS LRVN  | GLSTLVGNVT | 583       |     |
| AV117_Gp37   | GTKQIMWEGG | TRAGQNKSYV | TVKAWGNSFN | ATGDKARETV | FEVSDQCQYY  | FYSQRVAPTG | SETTGPVVQ  | FNGQVNARGS | ITDGS LRVN  | GLSTLVGNVT | 583       |     |
| T4_Gp37      | GTKQIMWEGG | TRAGQNKSYV | TVKAWGNSFN | ATGDKARETV | FEVSDQCQYY  | FYSQRVAPTG | SETTGPVVQ  | FNGQVNARGS | ITDGS LRVN  | GLSTLVGNVT | 583       |     |
| AV116_Gp37   | GTKQIMWEGG | TRAGQNKSYV | TVKAWGNSFN | ATGDKARETV | FEVSDQCQYY  | FYSQRVAPTG | SETTGPVVQ  | FNGQVNARGS | ITDGS LRVN  | GLSTLVGNVT | 583       |     |
| AV122_Gp37   | GTKQIMWEGG | TRAGQNKSYV | TVKAWGNSFN | ATGDKARETV | FEVSDQCQYY  | FYSQRVAPTG | SETTGPVVQ  | FNGQVNARGS | ITDGS LRVN  | GLSTLVGNVT | 583       |     |
| Conservation |            |            |            |            |             |            |            |            |             |            |           |     |
| AV110_Gp37   | MNNGLFVQGG | ASITGQVKIG | GTADARLW   | AEYGAIFRRS | EDKFIYIPTP  | KNAGEGGIS  | -NLRPLFIEL | SNCVMSMDH  | VDLGGGKREK  | EAAGT----  | 677       |     |
| AV118_Gp37   | MNNGLFVQGG | ASITGQVKIG | GTADARLW   | AEYGAIFRRS | EDKFIYIPTP  | KNAGEGGIS  | -NLRPLFIEL | SNCVMSMDH  | VDLGGGKREK  | EAAGT----  | 677       |     |
| AV112_Gp37   | MNNGLFVQGG | ASITGQVKIG | GTADARLW   | AEYGAIFRRS | EDKFIYIPTP  | KNAGEGGIS  | -NLRPLFIEL | SNCVMSMDH  | VDLGGGKREK  | EAAGT----  | 677       |     |
| AV113_Gp37   | MNNGLFVQGG | ASITGQVKIG | GTADARLW   | AEYGAIFRRS | EDKFIYIPTP  | KNAGEGGIS  | -NLRPLFIEL | SNCVMSMDH  | VDLGGGKREK  | EAAGT----  | 677       |     |
| AV117_Gp37   | MNNGLFVQGG | ASITGQVKIG | GTADARLW   | AEYGAIFRRS | EDKFIYIPTP  | KNAGEGGIS  | -NLRPLFIEL | SNCVMSMDH  | VDLGGGKREK  | EAAGT----  | 677       |     |
| T4_Gp37      | MNNGLFVQGG | ASITGQVKIG | GTADARLW   | AEYGAIFRRS | EDKFIYIPTP  | KNAGEGGIS  | -NLRPLFIEL | SNCVMSMDH  | VDLGGGKREK  | EAAGT----  | 677       |     |
| AV116_Gp37   | MNNGLFVQGG | ASITGQVKIG | GTADARLW   | AEYGAIFRRS | EDKFIYIPTP  | KNAGEGGIS  | -NLRPLFIEL | SNCVMSMDH  | VDLGGGKREK  | EAAGT----  | 677       |     |
| AV122_Gp37   | MNNGLFVQGG | ASITGQVKIG | GTADARLW   | AEYGAIFRRS | EDKFIYIPTP  | KNAGEGGIS  | -NLRPLFIEL | SNCVMSMDH  | VDLGGGKREK  | EAAGT----  | 677       |     |
| Conservation |            |            |            |            |             |            |            |            |             |            |           |     |
| AV110_Gp37   | ====TAGQRI | TWNMASDA-- | ----IRIN-- | --APTQSSN  | FIQGRKADVP  | KWYIGIG--  | -----      | -----      | -----       | DGNIV      | 730       |     |
| AV118_Gp37   | ====TAGQRI | TWNMASDA-- | ----IRIN-- | --APTQSSN  | FIQGRKADVP  | KWYIGIG--  | -----      | -----      | -----       | DGNIV      | 730       |     |
| AV112_Gp37   | ====TAGQRI | TWNMASDA-- | ----IRIN-- | --APTQSSN  | FIQGRKADVP  | KWYIGIG--  | -----      | -----      | -----       | DGNIV      | 730       |     |
| AV113_Gp37   | ====TAGQRI | TWNMASDA-- | ----IRIN-- | --APTQSSN  | FIQGRKADVP  | KWYIGIG--  | -----      | -----      | -----       | DGNIV      | 730       |     |
| AV117_Gp37   | ====TAGQRI | TWNMASDA-- | ----IRIN-- | --APTQSSN  | FIQGRKADVP  | KWYIGIG--  | -----      | -----      | -----       | DGNIV      | 730       |     |
| T4_Gp37      | ====TAGQRI | TWNMASDA-- | ----IRIN-- | --APTQSSN  | FIQGRKADVP  | KWYIGIG--  | -----      | -----      | -----       | DGNIV      | 730       |     |
| AV116_Gp37   | ====TAGQRI | TWNMASDA-- | ----IRIN-- | --APTQSSN  | FIQGRKADVP  | KWYIGIG--  | -----      | -----      | -----       | DGNIV      | 730       |     |
| AV122_Gp37   | ====TAGQRI | TWNMASDA-- | ----IRIN-- | --APTQSSN  | FIQGRKADVP  | KWYIGIG--  | -----      | -----      | -----       | DGNIV      | 730       |     |
| Conservation |            |            |            |            |             |            |            |            |             |            |           |     |
| AV110_Gp37   | -----YTY   | SHGIALNSDT | VDIAKPKLVG | NAQEGTDGNI | TGCGNFANL   | NTTINNL--  | -----      | -----      | -----       | -----      | 780       |     |
| AV118_Gp37   | -----YTY   | SHGIALNSDT | VDIAKPKLVG | NAQEGTDGNI | TGCGNFANL   | NTTINNL--  | -----      | -----      | -----       | -----      | 780       |     |
| AV112_Gp37   | -----YTY   | SHGIALNSDT | VDIAKPKLVG | NAQEGTDGNI | TGCGNFANL   | NTTINNL--  | -----      | -----      | -----       | -----      | 780       |     |
| AV113_Gp37   | -----YTY   | SHGIALNSDT | VDIAKPKLVG | NAQEGTDGNI | TGCGNFANL   | NTTINNL--  | -----      | -----      | -----       | -----      | 780       |     |
| AV117_Gp37   | -----YTY   | SHGIALNSDT | VDIAKPKLVG | NAQEGTDGNI | TGCGNFANL   | NTTINNL--  | -----      | -----      | -----       | -----      | 780       |     |
| T4_Gp37      | -----YTY   | SHGIALNSDT | VDIAKPKLVG | NAQEGTDGNI | TGCGNFANL   | NTTINNL--  | -----      | -----      | -----       | -----      | 780       |     |
| AV116_Gp37   | -----YTY   | SHGIALNSDT | VDIAKPKLVG | NAQEGTDGNI | TGCGNFANL   | NTTINNL--  | -----      | -----      | -----       | -----      | 780       |     |
| AV122_Gp37   | -----YTY   | SHGIALNSDT | VDIAKPKLVG | NAQEGTDGNI | TGCGNFANL   | NTTINNL--  | -----      | -----      | -----       | -----      | 780       |     |
| Conservation |            |            |            |            |             |            |            |            |             |            |           |     |
| AV110_Gp37   | PEQATITEVV | LRTSNPNPKG | INATLWGRG  | NGFTNIATIN | TSGDDYDVL   | YAGTYADKLI | VEYDATENTR | YISVIGLNGG | YQTPVTEPRA  | GHLVGVQVM  | 920       |     |
| AV118_Gp37   | PEQATITEVV | LRTSNPNPKG | INATLWGRG  | NGFTNIATIN | TSGDDYDVL   | YAGTYADKLI | VEYDATENTR | YISVIGLNGG | YQTPVTEPRA  | GHLVGVQVM  | 920       |     |
| AV112_Gp37   | PEQATITEVV | LRTSNPNPKG | INATLWGRG  | NGFTNIATIN | TSGDDYDVL   | YAGTYADKLI | VEYDATENTR | YISVIGLNGG | YQTPVTEPRA  | GHLVGVQVM  | 920       |     |
| AV113_Gp37   | PEQATITEVV | LRTSNPNPKG | INATLWGRG  | NGFTNIATIN | TSGDDYDVL   | YAGTYADKLI | VEYDATENTR | YISVIGLNGG | YQTPVTEPRA  | GHLVGVQVM  | 920       |     |
| AV117_Gp37   | PEQATITEVV | LRTSNPNPKG | INATLWGRG  | NGFTNIATIN | TSGDDYDVL   | YAGTYADKLI | VEYDATENTR | YISVIGLNGG | YQTPVTEPRA  | GHLVGVQVM  | 920       |     |
| T4_Gp37      | PEQATITEVV | LRTSNPNPKG | INATLWGRG  | NGFTNIATIN | TSGDDYDVL   | YAGTYADKLI | VEYDATENTR | YISVIGLNGG | YQTPVTEPRA  | GHLVGVQVM  | 920       |     |
| AV116_Gp37   | PEQATITEVV | LRTSNPNPKG | INATLWGRG  | NGFTNIATIN | TSGDDYDVL   | YAGTYADKLI | VEYDATENTR | YISVIGLNGG | YQTPVTEPRA  | GHLVGVQVM  | 920       |     |
| AV122_Gp37   | PEQATITEVV | LRTSNPNPKG | INATLWGRG  | NGFTNIATIN | TSGDDYDVL   | YAGTYADKLI | VEYDATENTR | YISVIGLNGG | YQTPVTEPRA  | GHLVGVQVM  | 920       |     |
| Conservation |            |            |            |            |             |            |            |            |             |            |           |     |
| AV110_Gp37   | KTDIVSSVPI | GAPIPWPTD  | PPEGVAMEG  | QTFDAGVYK  | LAAVYPSGVI  | PDMRGQIKG  | KPSGRAVLS  | EADGVKSHS  | SASASDGL    | TKTTSFDYG  | 880       |     |
| AV118_Gp37   | KTDIVSSVPI | GAPIPWPTD  | PPEGVAMEG  | QTFDAGVYK  | LAAVYPSGVI  | PDMRGQIKG  | KPSGRAVLS  | EADGVKSHS  | SASASDGL    | TKTTSFDYG  | 880       |     |
| AV112_Gp37   | KTDIVSSVPI | GAPIPWPTD  | PPEGVAMEG  | QTFDAGVYK  | LAAVYPSGVI  | PDMRGQIKG  | KPSGRAVLS  | EADGVKSHS  | SASAS       |            |           |     |
